# Supplementary material
Source: publisher site journal article supplement (https://www.degruyterbrill.com/publication/isbn/9783110321524/downloadAsset/9783110321524_Leseprobe.pdf%20-%20Adobe%20Acrobat%20Pro.pdf)
Supplement: Supplementary file 1 [file 9783110321524_Leseprobe.pdf%20-%20Adobe%20Acrobat%20Pro.pdf]

## § 8 Das Zustandekommen von Verträgen

- 1 Den Tatbestand des Vertrages bilden die Vereinbarungen darüber, welche Rechtswirkungen im Verhältnis der Vertragspartner zueinander herbeigeführt werden sollen. Das rechtliche Instrument, um diese Vereinbarungen zu treffen und gleichzeitig anzuordnen, dass diese Regelung fortan zwischen den Vertragspartnern gelten soll, sind die auf den Abschluss des Vertrages gerichteten Willenserklärungen (unten Rdn. 2 ff). In diesen Erklärungen müssen die Kontrahenten Konsens über das vertragliche Regelungsprogramm erzielen (unten Rdn. 136 ff). Wird dieser Konsens verfehlt, liegt also ein „Dissens“ vor, kann daran das Zustandekommen des Vertrages scheitern (unten Rdn. 165 ff).

### I. Die auf den Abschluss des Vertrages gerichteten Willenserklärungen

- 2 Ausführlich im Gesetz geregelt ist die Technik, einen Vertrag im Wege von Antrag und Annahme zu schließen (§§ 145 ff BGB, unten Rdn. 5 ff). Kennzeichnend für diese Technik ist ein arbeitsteiliges Verfahren: Die eine Seite legt einseitig das gesamte Regelungsprogramm fest, der anderen Seite bleibt vorbehalten, zu diesem Regelungsprogramm „ja“ zu sagen und damit zu bewirken, dass der Vertrag zu den aus dem Antrag ersichtlichen Bedingungen zustande kommt. Antrag und Annahme sind also aufeinander bezogene, inhaltlich nicht identische Willenserklärungen. Der Antrag enthält das Regelungsprogramm, die Annahme erschöpft sich in der bloßen Zustimmung des anderen Teils.
- 3 Selbstverständlich ist es möglich, dass die Partner eines in Aussicht genommenen Vertrages auch anders vorgehen. Sie können insbesondere zunächst *gemeinsam* das Regelungsprogramm ausarbeiten und dann diese Regelung durch die beiderseitige Zustimmung zu dem erarbeiteten Vertragstext in Geltung setzen (unten Rdn. 97 ff). Bei diesem Verfahren kommt der Vertrag durch identische Erklärungen beider Kontrahenten zustande.
- 4 Darüber hinaus kennt das Gesetz den Vertragsschluss im Wege der Versteigerung (§ 156 BGB, unten § 8 Rdn. 112 f). In der Praxis finden sich vielfältige Abwandlungen und Mischformen der genannten Grundtechniken des Vertragsschlusses. Die Techniken des Vertragsschlusses sind vom Gesetz nicht abschließend festgelegt (unten § 8 Rdn. 110 ff).

#### 1. Der Abschluss des Vertrages im Wege der Annahme des Antrags (§§ 145 ff BGB)

- 5 Beim Abschluss eines Vertrages im Wege von Antrag und Annahme<sup>3</sup> werden die für das Zustandekommen des Vertrages erforderlichen Einzelschritte zwischen den Kontrahenten aufgeteilt. Die Festlegung des für beide Seiten verbindlichen Regelungsprogramms erfolgt durch den Antragenden. Die Entscheidung über die In-Geltung-Setzung dieses Programms liegt beim Antragsempfänger, dem Akzeptanten. Der Akzeptant kann das Regelungsprogramm nur so, wie ihm angetragen, in Geltung setzen. Die Rechtsmacht, durch seine Erklärung den Vertrag in Geltung zu setzen, erlangt der Akzeptant aufgrund des Antrags.

---

(2013) S. 132 f; *Moussa*, Das Dogma vom formgerechten Zugang (erscheint demnächst) § 2 I 1 und 2. Die häufig anzutreffende Formel vom „wirksamen Zustandekommen eines Vertrages“ vermischt diese Unterscheidung und ist ungenau (*Stöhr* AcP Bd. 214 (2014) 425 Fn. 2).

3 Hierzu rechtsvergleichend und umfassend *Jessica Schmidt*, Der Vertragsschluss (2013).

## a. Der Antrag

§ 151 BGB formuliert, dass der Vertrag durch die Annahme des Antrags zustande kommt. Der Antrag geht grundsätzlich der Annahme voraus.<sup>4</sup> Es gelten für ihn die allgemeinen Grundsätze und Regeln für Willenserklärungen (dazu oben §§ 5–7), ergänzt um Besonderheiten, die sich aus der Zielsetzung und Funktion des Antrags ergeben, durch die bloße Zustimmung der anderen Seite (Annahme des Antrags) das Zustandekommen des Vertrages zu ermöglichen. 6

**Hinweis zur Terminologie:** Das Gesetz spricht von „Antrag“. Verbreitet wird in der Literatur und vor allem im Leben gleichbedeutend der Begriff „Angebot“ verwendet. Im Gesetz findet sich der Begriff „Angebot“ nur in anderem Zusammenhang (nämlich: als Angebot der Leistung, §§ 293 ff BGB). Dennoch ist es ganz unschädlich, statt von „Antrag und Annahme“ von „Angebot und Annahme“ zu sprechen, da sich aus dem Zusammenhang ergibt, was gemeint ist.

### aa. Der Tatbestand des Antrags

Ein Antrag zum Abschluss eines Vertrages liegt dem Tatbestand nach vor, wenn (1) der Inhalt des abzuschließenden Vertrages bestimmt wird und (2) es der vom Empfänger erkannte oder doch für ihn erkennbare Sinn der Erklärung ist, ihn hierdurch in die Lage zu versetzen, durch seine Zustimmung den Vertragsschluss zu bewirken. 7

#### (1) Inhaltliche Bestimmtheit

Zu den inhaltlichen Anforderungen an das Vorliegen eines Antrags heißt es in den Motiven: 8

**Der Inhalt des Antrags**  
Mot. I, S. 167 = Mugdan I, S. 444

„Der Antrag muss ... alle wesentlichen Bestandteile des in Aussicht genommenen Vertrages enthalten, nicht nur diejenigen, welche nach dem Gesetze zum Wesen des Vertrages gehören, sondern auch diejenigen, bezüglich deren nach der Absicht des Antragenden überhaupt Bestimmungen getroffen werden sollen.“

Diese Erläuterung bezieht sich primär auf den Standardfall, dass ein Vertrag geschlossen werden soll, der einem der im BGB geregelten Verträge (insbesondere also einem der typischen Schuldverträge im Sinne der §§ 433, 488, 535, 611, 631, 675 etc. BGB) entspricht. Die genannten Anforderungen lassen sich aber verallgemeinern. 9

#### (a) Vertragswesentliche Bestimmungen (*essentialia negotii*)

Bestimmungen, welche „zum Wesen des Vertrages gehören“ (sog. **essentialia negotii**) bilden das Mindestregelungsprogramm, das im Antrag festgelegt werden muss. 10

#### (aa) Vertragsparteien

Bei jedem Vertrag muss bestimmt werden, wer die Vertragspartner sein sollen, d.h. wen die Wirkungen des Vertrages treffen sollen. Wenn aus dem Antrag nichts anderes hervor- 11

<sup>4</sup> Zwingend erforderlich ist dies nicht, vgl. unten Rdn. 131.

### 3. Kapitel: Verträge

geht, werden der Antragende und der Antragsempfänger Vertragspartner. Wird der Antrag in fremdem Namen (also: im Namen des Vertretenen, oben § 4 Rdn. 66 ff) abgegeben, so soll der Vertrag zwischen dem Vertretenen und dem Antragsempfänger zustande kommen.

#### *(bb) Entgeltlichkeit*

- 12** Aus dem Antrag muss hervorgehen, ob es sich um einen entgeltlichen oder unentgeltlichen Vertrag (zu dieser Unterscheidung oben § 4 Rdn. 39 ff) handelt. Soll ein entgeltlicher Vertrag zustande kommen, muss das Entgelt im Antrag bestimmt werden oder doch aufgrund des Antrags bestimmbar sein.
- 13** **Beispiel:** Es genügt für einen Antrag auf Abschluss eines Kaufvertrages nicht zu schreiben: „Ich biete Ihnen meinen Oldtimer ... zum Kauf an“. Wenn der Empfänger mit „Einverstanden“ antwortet, gibt es keine Vereinbarung über den Kaufpreis, und ohne eine solche Vereinbarung kann ein Kaufvertrag nicht zustande kommen. Anders, wenn der Verkäufer zuvor in einer einschlägigen Zeitschrift ein Inserat geschaltet hatte, aus dem hervorging, dass er seinen genau beschriebenen Oldtimer zu einem genau bestimmten Festpreis verkaufen möchte. Wenn sich auf diese Anzeige zehn Interessenten melden und der Verkäufer dann dem Interessenten Nr. 7 schreibt: „Sie sind der Glückliche: Ich biete Ihnen meinen Oldtimer zum Kauf an“, kann der Interessent Nr. 7 dies nur so verstehen, dass der im Inserat genannte Festpreis gelten soll (vgl. oben § 5 Rdn. 66 ff).
- 14** Gelegentlich unterstellt das Gesetz, dass über die Entgeltlichkeit eine stillschweigende Vereinbarung getroffen wurde und eine bestimmte Höhe der Vergütung als vereinbart anzusehen ist (dazu unten Rdn. 163 f). Entsprechend reduzieren sich in diesen Fällen die Anforderungen an die Bestimmtheit des Antrags.

#### *(cc) Vertragsspezifische Pflichten*

- 15** Zu den wesentlichen Bestimmungen eines obligatorischen Vertrages gehören Festlegungen, wen welche Pflichten treffen sollen. Beim Kaufvertrag gehört zu den *essentialia negotii* die Bestimmung, ob der Antragende verkaufen oder kaufen will. Der genaue Inhalt der Pflichten des Verkäufers (vgl. hierzu § 433 Abs. 1 BGB) muss nicht genannt werden; die bloßen Bezeichnungen „verkaufen“, „kaufen“ werden im Verkehr als völlig ausreichend angesehen. Genauer Bestimmung bedarf die Kaufsache. Die Bestimmung erfolgt beim Kauf neuer Serienprodukte anhand von Gattungsmerkmalen (Gattungskauf, Beispiel: ein Laptop Marke x, Modell y, Ausstattungsmerkmale z). Bei Einzelstücken (wie z. B. einem gebrauchten Kfz) werden Angaben gemacht, die die Identifizierung der Sache ermöglichen (bei einem Gebrauchtwagen: Fahrzeug-Identifizierungsnummer, Tag der Erstzulassung, derzeitiges Kennzeichen oder dgl.). Entsprechendes gilt für Mietverträge. So ist bei Hotelzimmern die Vermietung anhand von Gattungsmerkmalen üblich (Hotel x, Zimmer mit Balkon und Meeresblick), bei Wohnungen ist Gegenstand des Vertrages in aller Regel ein genau individualisiertes Objekt (Adresse, Etage, links/rechts).

#### *(dd) Sonstige essentialia*

- 16** Für die Übereignung (§§ 929 ff BGB, dazu oben § 3 Rdn. 11 ff) ist die genaue Bestimmung der Sache(n) wesentlich, deren Eigentum übertragen werden soll.<sup>5</sup>

---

<sup>5</sup> Zu den Anforderungen an die Bestimmtheit bei der Auflassung eines Grundstücks im Unterschied zum Kaufvertrag über das Grundstück instruktiv BGH vom 18.1.2008, NJW 2008, 1658 Rdn. 15 ff.

*(b) Ergänzende Bestimmungen (accidentalia negotii)*

Soll sich der Vertrag nach dem Willen des Antragenden nicht auf das notwendige Mindestprogramm beschränken, so muss der Antrag Bestimmungen zu allen weiteren Punkten enthalten, die geregelt werden sollen. So wird beim Verkauf von Gebrauchtwagen typischerweise eine Verkürzung der Verjährungsfrist für Mängelansprüche vorgesehen (hierzu unten § 21 Rdn. 48 und 59). Derartige zusätzliche (also: nicht vertragsnotwendige) Bestimmungen werden als **accidentalia negotii** bezeichnet. 17

*(c) Die Ausräumung von Unklarheiten des Antrags durch Auslegung*

Ob dem Bestimmtheitserfordernis genügt ist, ist im Wege der Auslegung des Antrags zu klären. Selbst noch so unklare Angaben sind unschädlich, wenn der Empfänger dem Antrag genau das entnimmt, was der Antragende als vertragliche Regelung vereinbaren wollte (oben § 5 Rdn. 51). Darf der Empfänger einen objektiv unklaren Antrag in einem bestimmten Sinne verstehen, so gilt der Antrag mit diesem Inhalt, auch wenn es an einem entsprechenden Willen des Antragenden fehlt (oben § 5 Rdn. 61). Daher darf man nicht vorschnell das tatbestandliche Vorliegen eines Antrags mit dem Argument verneinen, zu einem vertragswesentlichen Punkt fehle es an bestimmten Angaben. 18

**Beispiel:** Im Fall „Zwei Zimmer mit drei Betten“ (Sachverhalt unten § 30) hätte der Gast seine Bestellung kaum unglücklicher formulieren können: Sind zwei Zimmer mit insgesamt drei Betten gemeint, oder zwei Dreibettzimmer? Diese Unklarheit ist rechtlich aber unerheblich, wenn der Gast insgesamt drei Betten meint und der Hotelier die Bestellung im gleichen Sinne versteht, oder wenn der Gast insgesamt sechs Betten meint und der Hotelier zwei Drei-Bett-Zimmer reserviert. Die Bestellung kann also durchaus taugliche Grundlage für das Zustandekommen eines Vertrages sein, und deshalb genügt sie den tatbestandlichen Anforderungen an einen Antrag.<sup>6</sup> 19

Selbst das völlige Fehlen ausdrücklicher Angaben zu vertragswesentlichen Punkten kann im Wege der Auslegung zu überwinden sein. Der Antrag kann dem Sinne nach auf Bestimmungen und Daten verweisen, die dem Antragsempfänger (besser als dem Antragenden) bekannt sind, oder es soll dem Antragsempfänger überlassen sein, die fehlende Bestimmung zu treffen.<sup>7</sup> Es genügt, dass die essentialia negotii anhand des Antrags durch Auslegung bestimmbar sind. 20

**Beispiele:** Wer ein Hotelzimmer ohne Preisangabe bestellt, nimmt auf die üblichen Preise Bezug, die in dem Hotel gelten. Die Bestellung an der Theke „ein Pils bitte“ meint: „Ein Pils zu dem in der Karte ausgewiesenen üblichen Preis“. Selbst die Bestimmung des Umfangs einer zu erbringenden Leistung kann dem Angebotsempfänger überlassen werden.<sup>8</sup> 21

*(2) Eröffnung einer annahmefähigen Position für den Empfänger („Rechtsbindungswille“)*

Ein Antrag im Sinne der §§ 145 ff BGB liegt nur vor, wenn die Erklärung so beschaffen ist, „dass sofort mit der Zustimmung des Adressaten der Vertrag zu Stande kommt“.<sup>9</sup> Ausgegrenzt werden damit vor allem die schon oben (§ 5 Rdn. 12 ff) erörterten Bereiche rein gesellschaftlicher oder freundschaftlicher Absprachen, die ihrer Art nach nicht zu einer vertraglichen, also: rechtlichen Bindung führen sollen, sowie Erklärungen, die im Vor- 22

<sup>6</sup> Leenen, Liber Amicorum Jürgen Prölss (2009), 153 (162 f).

<sup>7</sup> Faust AT § 3 Rdn. 3.

<sup>8</sup> Beispiel: Auftanken an einer Selbstbedienungstankstelle. Näher hierzu unten Rdn. 32.

<sup>9</sup> Mot. I, S. 166 = Mugdan I, S. 444.

### 3. Kapitel: Verträge

feld des Vertragsschlusses gemacht werden, also *noch nicht* zu einer rechtlichen Gebundenheit führen sollen (oben § 5 Rdn. 16 ff). Kann die Erklärung nicht als Ausdruck des Willens verstanden werden, das Zustandekommen eines Vertrages allein von der Zustimmung des Empfängers abhängig zu machen, handelt es sich nicht um einen Antrag im Sinne der §§ 145 ff BGB.

- 23** Herkömmlich wird dieses für den Antrag wesentliche Kriterium als **Rechtsbindungswille** bezeichnet. Der Ausdruck ist wenig glücklich. Zum einen nämlich kommt es nicht darauf an, ob der Erklärende den wirklichen Willen hat, rechtliche Bindungen einzugehen, sondern darauf, ob die Erklärung als Ausdruck eines solchen Willens verstanden werden kann.<sup>10</sup> Darüber hinaus verwendet der BGH die Bezeichnung „Rechtsbindungswille“ synonym zu „Erklärungsbewusstsein“ und gar „Geschäftswille“,<sup>11</sup> was zusätzlich zur Verwirrung beiträgt.<sup>12</sup> Der Begriff ist aber so verbreitet, dass daran kaum vorbeizukommen ist.
- 24** Beispiele von Äußerungen, die Vertragsabschlüsse nur **vorbereiten** sollen, bilden Verkaufskataloge, Werbeprospekte („Sonderangebote – nur kurze Zeit!“), Zeitungsinserate („Zwei-Zimmer-Wohnung zu vermieten!“), Schaufensterauslagen, Internetseiten von online-Verkaufshäusern mit mehr oder weniger detaillierten Produktbeschreibungen.<sup>13</sup> Es handelt sich hierbei um Informationen über Produkte und Leistungen, durch die das Interesse der Adressaten geweckt und deren Bereitschaft zu einem Vertragsschluss gefördert werden soll. Eine solche bloße Information enthält nicht schon das Angebot im Rechtssinne, sondern lädt die Adressaten dazu ein, Angebote zu machen (**invitatio ad offerendum**).<sup>14</sup> Der Verbreiter dieser verkaufsfördernden Informationen will damit noch nicht die Kontrolle über das Zustandekommen von Verträgen aus der Hand geben; er will sich nicht zuletzt vor der Gefahr schützen, mehr vertragliche Verpflichtungen einzugehen als er erfüllen kann.
- 25** **Beispiel:** Eine **Schaufensterauslage** stellt in aller Regel kein Angebot im Rechtssinne dar.<sup>15</sup> Eine falsche (zu niedrige) Preisauszeichnung hat daher nicht die Folge, dass ein Kunde darauf bestehen kann, die Sache zu diesem Preis zu erhalten. Erklärt er, die Sache zu dem im Schaufenster ausgewiesenen Preis kaufen zu wollen, liegt darin nicht die Annahme eines Angebots, sondern ein Angebot des Kunden, das der Verkäufer annehmen oder ablehnen kann.
- 26** Vielfach ergeben sich aus der betrieblichen Organisation der Geschäftsvorgänge mit Kunden Hinweise darauf, welche Vorgänge sich im Vorfeld rechtsgeschäftlicher Erklärungen abspielen und wo und wann die für das Zustandekommen des Vertrages erforderlichen Erklärungen abgegeben werden. Der Einsatz moderner Computersysteme in Verbindung mit Scanner-Kassen, die dem Verkäufer eine genaue Kontrolle jedes einzelnen Geschäftsvorgangs erlauben, spricht dafür, dass der Verkäufer sich diese Kontrollmöglichkeit vorbehalten will und die auf den Abschluss des Vertrages gerichtete Erklärung daher erst von den Kassenangestellten nach Eingabe des vom Kunden ausgesuchten Artikels in das System abgegeben wird.

10 BGH vom 18.12.2008, NJW 2009, 1141 Rdn. 7; BGH vom 21.6.2012, NJW 2012, 3366 Rdn. 14; vgl. auch oben § 5 Rdn. 14.

11 BGH vom 7.6.1984, BGHZ 91, 324 = NJW 1984, 2279 – Fall „Sparkasse“, Sachverhalt unten § 30. Zu den Begriffen Erklärungsbewusstsein und Geschäftswille oben § 5 Rdn. 25 und 27.

12 Zur Unterscheidung der Begriffe Erklärungsbewusstsein und Rechtsbindungswille *M. Schwab Iuratio* 2010, 73 ff.

13 Zu Waren- und Dienstleistungspräsentationen im Internet näher *Härting*, Internetrecht (5. Aufl. 2014) Rdn. 437 ff.

14 BGH vom 4.2.2009, NJW 2009, 1337 (1338 Rdn. 12). Vgl. auch schon Mot. I, S. 166 f = Mugdan I, S. 444.

15 *Jauernig/Mansel* § 145 Rdn. 3; *Wolf/Neuner* AT § 37 Rdn. 7; *Medicus* AT Rdn. 360; *Köhler* AT § 8 Rdn. 10.

Dem kommt insbesondere Bedeutung zu für den Abschluss von Kaufverträgen in **Selbstbedienungsgeschäften**. Der Kunde, der Waren aus den Regalen nimmt und in seinen Einkaufswagen legt, kann und darf es sich noch anders überlegen und Artikel wieder zurückstellen. Daher kommt allein durch die Entnahme von Waren aus den Regalen noch kein Kaufvertrag zustande.<sup>16</sup> Der Kunde legt sich erst an der Kasse fest und gibt daher erst dort die auf den Abschluss des Vertrages gerichtete Erklärung ab. Ein Teil des Schrifttums deutet dies so, dass der Kunde durch das Vorweisen der Ware an der Kasse Angebote annehme, die der Verkäufer den Kunden durch die Aufstellung der Ware in den Regalen gemacht habe.<sup>17</sup> Eine solche frühe Bindung des Verkäufers widerspricht indessen vielfach dessen erkennbarem Interesse, durch die Kassengestellten anhand der dort verfügbaren Computerdaten und ggf. spezieller Anweisungen und Listen noch eine letzte Überprüfung des Geschäftsvorgangs vorzunehmen.<sup>18</sup> Würde der Kunde an der Kasse das Angebot annehmen, das bereits in der Bereitstellung der Ware in den Regalen liegt, hätten die Kassengestellten keinerlei Einfluss mehr auf das Zustandekommen des Vertrages. Sie müssten nicht einmal Vertretungsmacht zum Abschluss von Verträgen im Namen des Unternehmensträgers haben, da bei dieser Konstruktion keine der für das Zustandekommen von Verträgen mit den Kunden erforderlichen Willenserklärungen von den Kassengestellten stammt. Diese Konsequenz widerspräche eklatant den Anschauungen des Verkehrs, denen nicht zuletzt § 56 HGB Rechnung zu tragen sucht. Daher ist regelmäßig davon auszugehen, dass (erst) die Kassengestellten die auf den Abschluss des Vertrages gerichteten Erklärungen im Namen des Verkäufers abgeben.<sup>19</sup>

Schließlich kann es sein, dass der Vertrag überhaupt nicht in der Technik von Antrag und Annahme, sondern durch die beiderseitigen Unterschriften unter einen vollständigen Vertragstext zustande kommen soll (unten Rdn. 97 ff). Dann soll durch die im Vorfeld der Unterzeichnung der Vertragsurkunde abgegebenen Erklärungen typischerweise keine „annahmefähige Position“ (unten Rdn. 40) für die andere Seite geschaffen werden. Hierzu bestimmt § 154 Abs. 2 BGB: „Ist eine Beurkundung des beabsichtigten Vertrages verabredet worden, so ist im Zweifel der Vertrag nicht geschlossen, bis die Beurkundung erfolgt ist“. Die auf den Abschluss des Vertrages gerichteten Erklärungen werden also erst mit der Unterzeichnung der Vertragsurkunde abgegeben.<sup>20</sup>

**Beispiel „Schriftlicher Mietvertrag“:** V hat eine 2-Zimmer-Wohnung zu vermieten, um die sich eine große Zahl von Interessenten, darunter S, bewirbt. Zur persönlichen Vorstellung und Wohnungsbesichtigung lädt V fünf Bewerber/innen ein, darunter S. Schließlich ruft V S an und erklärt ihr: „Sie bekommen die Wohnung, ich habe mich für Sie als neue Mieterin entschieden. Bitte kommen Sie morgen vorbei zur Unterzeichnung des Vertrages“. Am nächsten Tag bespricht V mit S noch einige Details eines Vertragsformulars, das er schon vorbereitend weitgehend ausgefüllt hat, schließlich setzen beide ihre Unterschriften unter diese Vertragsurkunde. Weder die Bewerbung der S noch die Zusage des V, S bekomme die Wohnung, hatten den Sinn, bereits eine annahmefähige Position für die andere Seite zu schaffen.

### (3) Ausdrückliche/konkludente Erklärung

Ein Vertragsschluss kann dem anderen ausdrücklich oder konkludent angetragen werden. Ausdrückliche Angebote werden typischerweise von Handwerkern erstellt, enthalten eine genaue Leistungsbeschreibung, den Preis der Leistungen, und werden für eine bestimmte

16 BGH vom 4.5.2011, NJW 2011, 2871 Rdn. 15.

17 Palandt/Ellenberger § 145 Rdn. 8; Bamberger/Roth/Eckert § 145 Rdn. 43; Medicus AT Rdn. 363, Bork AT Rdn. 719; Staudinger/Bork (2010) § 145 Rdn. 7; Schiemann, in: Staudinger/Eckpfeiler (2014) C. Rdn. 67.

18 Rütters/Stadler AT § 19 Rdn. 5.

19 Erman/Armbrüster § 145 Rdn. 10; MüKo/Busche § 145 Rdn. 12; Faust AT § 3 Rdn. 4.

20 Bork AT Rdn. 776.

### 3. Kapitel: Verträge

Zeit bindend (unten Rdn. 49 ff) abgegeben. Die Verkäufer von neuen Kraftfahrzeugen lassen sich vielfach eine „verbindliche Bestellung“ unterschreiben, nachdem alle Details des Antrags mit dem Kunden besprochen worden sind.

- 31** Sehr viele Verträge kommen ohne ausdrückliche Erklärungen durch eine Abfolge von Handlungen zustande, die als Ausdruck des Willens verstanden werden können, einen Vertrag zu schließen (konkludente Erklärungen). Klärungsbedürftig (und durch Auslegung zu ermitteln) ist dann vielfach, welcher Vorgang als Antrag, welcher als Annahme zu deuten ist. Wichtigster Anhaltspunkt ist die Frage, zu welchem Zeitpunkt der Vertrag nach der Interessenlage als geschlossen anzusehen, also durch die Annahme des Antrags zustande gekommen ist. Von der Annahmeerklärung wird dann auf den Antrag „zurückgerechnet“.<sup>21</sup>
- 32** **Beispiel „Selbstbedienungstankstelle“:** Dem Betreiber der Tankstelle ist daran gelegen, möglichst früh einen vertraglichen Anspruch auf Bezahlung des Benzins zu erwerben, das der Kunde in den Fahrzeugtank füllt (dies schon deshalb, um der Gefahr vorzubeugen, keine vertraglichen Ansprüche gegen Kunden zu haben, die nach dem Auftanken „vergessen“, den Weg zur Kasse zu gehen). Der Kunde hat kein schützenswertes Interesse daran, den Vertrag erst an der Kasse der Tankstelle zu schließen, da er es sich ohnehin nicht anders überlegen und das abgefüllte Benzin nicht zurückgeben kann. Der Vertrag wird daher an der Zapfsäule durch das Befüllen des Tanks geschlossen.<sup>22</sup> Der Kunde nimmt durch das Auftanken des Fahrzeugs ein Angebot des Betreibers der Tankstelle an.<sup>23</sup> Das Angebot liegt in der Bereitstellung der Pumpe zur Selbstbedienung durch die Kunden. Das Angebot überlässt es den Kunden, die genaue Menge Benzin zu bestimmen, über die der Vertrag geschlossen wird.
- 33** Weit verbreitet finden sich konkludente Angebote durch die tatsächliche Bereitstellung einer Leistung, deren Inanspruchnahme zum Vertragsschluss führt. Derartige „**Realofferten**“ liegen nach der Rechtsprechung insbesondere in der Bereitstellung von Energie durch Stromversorgungsunternehmen an hierfür vorgesehenen Übergabepunkten.<sup>24</sup> Die Realofferte richtet sich an denjenigen, der die tatsächliche Verfügungsgewalt über die Entnahmeverrichtung hat,<sup>25</sup> und sie wird von dem Nutzer als Angebot zum Abschluss eines Stromversorgungsvertrages verstanden.<sup>26</sup>

#### bb. Die Wirksamkeit des Antrags

- 34** Die Wirksamkeit des Antrags richtet sich nach den allgemeinen Bestimmungen über empfangsbedürftige Willenserklärungen.

##### *(1) Wirksamkeitserfordernisse*

- 35** Wichtigstes Erfordernis für die Wirksamkeit des Antrags ist dessen Zugang (§ 130 BGB, oben § 6 Rdn. 9 ff) beim Empfänger, also bei demjenigen, dem die Schließung des Vertra-

---

21 Ein Beispiel zu dieser Vorgehensweise findet sich auch bei *Medicus* AT Rdn. 362. Zur Bedeutung für die Methodik der Fallbearbeitung unten § 25 Rdn. 24 f.

22 BGH vom 4.5.2011, NJW 2011, 2871 Rdn. 13.

23 Erman/*Armbrüster* § 145 Rdn. 10; Staudinger/*Bork* (2010) § 145 Rdn. 8; *Bork* AT Rdn. 718; Wolf/*Neuner* AT § 37 Rdn. 11; *Köhler* AT § 8 Rdn. 12; *S. Lorenz* LMK 2011, 319864.

24 BGH vom 2.7.2014, NJW 2014, 3148 Rdn. 10 mit ausführlichen Rspr.-Nachweisen; BGH vom 22.7.2014, NJW 2014, 3150 Rdn. 12.

25 BGH vom 22.1.2014, NJW 2014, 1951 Rdn. 13; BGH vom 2.7.2014, NJW 2014, 3148 Rdn. 12.

26 Zur Rechtslage, falls der Nutzer ausdrücklich erklärt, keinen Vertrag schließen zu wollen, unten Rdn. 60 f.

ges angetragen wird. Werden Dritte beim Vertragsschluss im Namen des vorgesehenen Vertragspartners (also: als dessen Stellvertreter) tätig, so genügt der Zugang bei diesen Personen (oben § 6 Rdn. 14), ohne dass es auf das Vorliegen von aktiver oder passiver Vertretungsmacht ankommt.<sup>27</sup> Durch Zugang wirksam werden kann auch eine verkörperte Erklärung, die ohne Willen des Erklärenden auf den Weg zum Empfänger gebracht worden ist (oben § 6 Rdn. 70ff). Es genügt insoweit, dass sie den Empfänger in einer Weise erreicht, die auf einen Willen des Erklärenden zur Abgabe der Erklärung schließen lässt, auch wenn dieser Schluss in Wirklichkeit nicht berechtigt ist.

**Schulbeispiel** ist der „auf dem Schreibtisch liegen gebliebene Brief“ (oben § 6 Rdn. 71): Student S unterschreibt einen Bestellschein für das Abonnement einer Ausbildungszeitschrift, lässt den frankierten Brief dann aber auf dem Schreibtisch liegen, um sich noch einmal mit Kommilitonen zu beraten. Ein Familienmitglied sieht den Brief und bringt ihn in der irrigen Meinung zur Post, S habe dies vergessen. Der Empfänger schickt S umgehend das erste Heft der Zeitschrift und besteht auf Zahlung der Abonnementsgebühr für ein Jahr. – Der Antrag des S ist wirksam, der Vertrag zustande gekommen.<sup>28</sup>

36

### (2) Wirksamkeitshindernisse (Nichtigkeitsgründe)

Der Antrag ist nichtig, wenn er von einem Geschäftsunfähigen abgegeben wird (§§ 104, 105 Abs. 1 BGB, oben § 6 Rdn. 76ff). Eine Nichtigkeit gemäß §§ 116 Satz 2, 117 Abs. 1, 118 BGB ist denkbar, jedoch ohne erhebliche praktische Bedeutung.

37

### (3) Umstände, die die Wirksamkeit des Antrags nicht beeinträchtigen

Wie die knappe Zusammenstellung oben zeigt, sind es nur wenige Störungen, die der Wirksamkeit eines Antrags entgegenstehen können. Darin kommt das Bestreben des Gesetzes zum Ausdruck, das Zustandekommen von Verträgen zu fördern (oben § 6 Rdn. 74). Abweichend von vielen Darstellungen im Schrifttum können insbesondere auch Minderjährige ohne Einwilligung des gesetzlichen Vertreters anderen die Schließung eines Vertrages antragen, der ihnen rechtlich nicht lediglich vorteilhaft ist. Der Antrag ist wirksam (oben § 6 Rdn. 123ff) und führt, wenn er angenommen wird, zum Zustandekommen des Vertrages (§ 108 BGB). Dasselbe gilt für einen Antrag, den jemand in fremdem Namen (also: als Stellvertreter) abgibt. Vertretungsmacht ist nicht Voraussetzung für die Wirksamkeit der auf den Abschluss eines Vertrages gerichteten Willenserklärung des Vertreters, wie sich aus § 177 BGB ergibt (oben § 6 Rdn. 130ff). Wegen weiterer Gründe, die die Wirksamkeit eines Antrags nicht beeinträchtigen, wird auf die Darstellung oben § 6 Rdn. 116ff verwiesen.

38

## cc. Die Wirkungen des Antrags

Grundsätzlich führt eine wirksame Willenserklärung dazu, dass ein Rechtsgeschäft zustande kommt. Der Antrag allein kann diese Wirkung nicht haben, da der Vertrag erst durch die Annahme des Antrags zustande kommt, § 151 BGB. Die Wirkungen des Antrags bestehen darin, die Annahme durch den Empfänger vorzubereiten und zu ermöglichen.

39

<sup>27</sup> Häublein JURA 2007, 728 (729).

<sup>28</sup> Zum Recht des S, den Vertrag gemäß § 119 Abs. 1 Alt. 2 BGB anzufechten, unten § 14 Rdn. 46.



### 3. Kapitel: Verträge

#### (1) Die annahmefähige Position für den Empfänger

- 40** Durch einen Antrag wird der Empfänger in die Lage versetzt, die Annahme zu erklären und damit zu bewirken, dass der Vertrag zustande kommt. Dem Antragsempfänger wird also eine recht günstige Position eingeräumt: Ob der Vertrag zu den Bedingungen des Antragenden zustande kommt, hängt nunmehr allein von seinem Willen ab.
- 41** Für diese Rechtsmacht, die der Antragsempfänger durch den Antrag erwirbt, steht kein allgemein eingeführter Begriff zur Verfügung. Es besteht zwar eine gewisse Ähnlichkeit mit einem Gestaltungsrecht (oben § 3 Rdn. 39 ff), da der Antragsempfänger es in der Hand hat, durch die Erklärung der Annahme Rechtswirkungen auch im Rechtskreis des Antragenden auszulösen.<sup>29</sup> Die Annahme eines Antrags stellt aber kein eigenständiges (einseitiges) Rechtsgeschäft dar;<sup>30</sup> sie ist wie der Antrag eine Willenserklärung, die darauf gerichtet ist, zum Zustandekommen des Vertrages zu führen. Es entsteht durch den Antrag kein Annahmerecht, sondern lediglich eine „annahmefähige Position“ für den Empfänger.<sup>31</sup> Sie gehört immerhin zum Vermögen des Empfängers und ist grundsätzlich vererblich.
- 42** Entsteht durch eine Erklärung keinerlei Möglichkeit für den Empfänger, durch Zustimmung einen Vertragsschluss zu bewirken, liegt kein Antrag, sondern eine bloße invitatio ad offerendum (oben Rdn. 24) vor.
- 43** Die durch den Antrag für den Gegner geschaffene annahmefähige Position bedarf einer zeitlichen Begrenzung. Der Zeitraum, innerhalb dessen die Annahme erklärt werden kann (**Annahmefrist**) ergibt sich in erster Linie aus dem Antrag selbst (§ 148 BGB). Lässt sich dem Antrag hierzu nichts entnehmen, gelten die Fristen des § 147 BGB.
- 44** Wo die Möglichkeit zu einer Kommunikation von Person zu Person besteht – also: unter Anwesenenden (§ 147 Abs. 1 Satz 1 BGB), am Telefon (§ 147 Abs. 1 Satz 2 BGB) oder beim Chatten im Internet – sieht das Gesetz vor, dass ein Antrag nur sofort angenommen werden kann. Das macht Sinn in alltäglichen Situationen wie beim Kauf einer Zeitung am Kiosk oder der telefonischen Bestellung einer Pizza zur Lieferung ins Haus. Entscheidend ist aber stets, ob der Antragende erkennbar eine unmittelbare Entscheidung über die Annahme des Antrags erwartet. Vielfach ergibt sich aus dem Antrag ausdrücklich oder konkludent, dass dem anwesenden Antragsempfänger eine ausreichende Annahmefrist zugebilligt werden soll, und dann gilt gemäß § 148 BGB diese längere Frist.
- 45** Wird der Antrag einem Abwesenden gemacht – also: per Brief, Fax, E-Mail – und ergibt sich aus dem Antrag keine besondere Annahmefrist (§ 148 BGB), so sieht § 147 Abs. 2 BGB vor, dass der Antrag bis zu dem Zeitpunkt angenommen werden kann, „in welchem der Antragende den Eingang der Antwort unter regelmäßigen Umständen erwarten darf“. Zu berücksichtigen ist die Zeit, die die Übermittlung des Antrags an den Empfänger<sup>32</sup> und die Übermittlung der Annahme- oder Ablehnungserklärung an den Antragenden erfordert, sowie eine je nach Art des Geschäfts angemessene Überlegungs- und Bearbeitungsfrist für den Angebotsempfänger.
- 46** **Beispiele:** Für die elektronische Bestellung eines Kunden bei einem online-Versandhändler gelten sehr kurze Fristen, da der Händler anhand seines Datenbanksystems die Verfügbarkeit der Ware und

<sup>29</sup> Teilweise wird die Auffassung vertreten, es handle sich um ein Gestaltungsrecht: so z. B. Palandt/*Ellenberger* § 145 Rdn. 5; dagegen zu Recht *Bork* AT Rdn. 723.

<sup>30</sup> *Köhler* AT § 8 Rdn. 14.

<sup>31</sup> *MüKo/Busche* § 145 Rdn. 21: „Annahmeposition“; *Köhler* AT § 8 Rdn. 14: „Annahmemöglichkeit“. Der von mir in *AcP* Bd. 188 (1988), S. 381 (395) verwendete Begriff der „Gestaltungsposition“ birgt die Gefahr von Missverständnissen in sich.

<sup>32</sup> Die Frist beginnt daher mit Abgabe der Erklärung, nicht erst mit deren Zugang: BGH vom 11.6.2010, NJW 2010, 2873 Rdn. 11 (Fall „Verspätete Annahme“, Sachverhalt unten § 30).

damit seine Bereitschaft zum Vertragsschluss rasch klären und seine Annahmeerklärung auf elektronischem Wege übermitteln kann. – Anderes gilt für das Angebot zum Kauf einer Eigentumswohnung. Hier wird der Verkäufer die Bonität des Käufers prüfen wollen, die Annahmeerklärung bedarf notarieller Beurkundung, schließlich erfordert die postalische Übermittlung von Ausfertigungen sowohl des notariell beurkundeten Angebots wie der notariell beurkundeten Annahmeerklärung Zeit. Der BGH hat entschieden, dass der Eingang der Annahmeerklärung unter diesen Umständen regelmäßig innerhalb von vier Wochen erwartet werden könne.<sup>33</sup>

Das Gesetz geht so weit, die Annahmefähigkeit des Angebots noch über den Tod des Antragenden hinaus aufrecht zu erhalten (§ 153 BGB). 47

**Beispiel:** K bestellt schriftlich bei einem Versandhaus V einen handelsüblichen Werkzeugkasten. Kurz nachdem er den Brief in den Briefkasten geworfen hat, kommt er bei einem Verkehrsunfall ums Leben. Der Antrag wird trotz des Todes des K mit Zugang bei V wirksam (§ 130 Abs. 2 BGB) und bleibt annahmefähig (§ 153 BGB). Da der Werkzeugkasten nicht auf persönliche Bedürfnisse des K zugeschnitten ist („handelsüblich“), fehlt es an Anhaltspunkten für einen abweichenden Willen des K (§ 153 BGB: „es sei denn, dass ...“).<sup>34</sup> Der Vertrag kommt gemäß § 151 Satz 1 Hs. 2 BGB (dazu unten Rdn. 89) mit dem Versenden des Werkzeugkastens durch V zustande. Vertragspartner des V ist der Erbe des K (§ 1922 BGB). 48

## (2) Die Bindung an den Antrag

Zur Absicherung der annahmefähigen Position des Empfängers sieht das Gesetz vor, dass der Antragende grundsätzlich während der Annahmefrist an den Antrag gebunden ist, § 145 BGB. Bindung in diesem Sinne bedeutet, dass dem Empfänger die Möglichkeit, durch die Annahme zum Vertragsschluss zu kommen, nicht durch einen Widerruf oder eine Rücknahme des Antrags entzogen werden kann.<sup>35</sup> Dadurch soll der Empfänger in die Lage versetzt werden, etwa erforderliche Erkundigungen einzuholen und die Entscheidung über den Vertragsschluss sachgerecht vorzubereiten. Dieser Prozess kann mit nennenswerten Kosten und Mühen verbunden sein, die ihren Zweck verfehlen würden, wenn der Antragende jederzeit einfach seinen Antrag zurückziehen könnte. Daher ist es sinnvoll, dass das Gesetz die Bindung an den Antrag als Regel setzt. 49

Die Bindung an den Antrag ist kein begrifflich notwendiges Merkmal eines Antrags. Die Bindung kann, wie § 145 Hs. 2 BGB ausdrücklich klarstellt, ausgeschlossen werden. Geschieht dies, bleibt der Antrag doch, solange er nicht widerrufen wird, annahmefähig.<sup>36</sup> Wird die Bindung auf eine bestimmte Zeit beschränkt, kann hierin zugleich liegen, dass auch die Annahmefähigkeit zu diesem Zeitpunkt enden soll. Es kann aber auch die Annahmefähigkeit darüber hinaus erhalten bleiben, nunmehr aber unter dem Vorbehalt, dass das Angebot nicht widerrufen wird. Was gemeint ist, ist durch Auslegung zu bestimmen.<sup>37</sup> 50

33 BGH vom 11.6.2010, NJW 2010, 2873 Rdn. 12 (Fall „Verspätete Annahme“, Sachverhalt unten § 30).

34 Streitig ist, ob es insoweit auf den hypothetischen Willen des Verstorbenen ankommt (so z. B. Erman/*Armbrüster* § 153 Rdn. 2) oder ob die allgemeinen Grundsätze der Auslegung nach den Verständnismöglichkeiten des Empfängers (oben § 5 Rdn. 50ff) gelten (so vorzugswürdig *Medicus* AT Rdn. 377; *Faust* AT § 3 Rdn. 11).

35 Palandt/*Ellenberger* § 145 Rdn. 3; *Bork* AT Rdn. 724. Dazu auch oben § 7 Rdn. 6f.

36 *Faust* AT § 3 Rdn. 9.

37 Soll durch einen Vermerk wie „freibleibend“ nicht nur die Bindung an den Antrag ausgeschlossen sein, sondern klargestellt werden, dass für die Adressaten keine „annahmefähige Position“ begründet werden soll, liegt ein Antrag im Rechtssinne nicht vor (oben Rdn. 42).

### 3. Kapitel: Verträge

- 51** Der Antragende kann daran interessiert sein, seine Bindung auszuschließen, andererseits die Annahmefähigkeit des Antrags bestehen zu lassen, um sich erst wenn die Annahme erfolgt zu entscheiden, ob hierdurch der Vertrag zustande kommt oder dies noch von ihm durch einen unverzüglichen Widerruf des Antrags verhindert wird. Ob der Antragende alle diese Vorteile zu seinen Gunsten optimieren kann, ist streitig.<sup>38</sup> Im Interesse der Rechtssicherheit sollte nicht daran gerüttelt werden, dass die Annahme eines annahmefähigen Antrags zum Zustandekommen des Vertrages führt. Will der Antragende sich hiervon noch lösen können, muss er ein (kurzfristig auszuübendes) Rücktrittsrecht vorsehen.<sup>39</sup>
- 52** Am anderen Ende der Skala finden sich Angebote, die dem Empfänger sehr langfristig eine gesicherte annahmefähige Position einräumen. Unwiderruflich erteilte Angebote mit langer Annahmefrist können einen selbständigen wirtschaftlichen Wert verkörpern, wird es dem Empfänger doch möglich, mit dem Angebot in der Tasche spekulativ die weitere Marktentwicklung zu beobachten und zu seinen Gunsten auszunutzen. Solche längerfristigen Angebote werden **Option** genannt. Vielfach wird der Optionsgeber nur gegen ein Entgelt dazu bereit sein, dem Optionsnehmer eine derart vorteilhafte Position einzuräumen. Dann besteht die Möglichkeit, einen **Optionsvertrag** (synonym: Angebotsvertrag) zu schließen.<sup>40</sup> Die eine Seite macht der anderen auf bestimmte Zeit ein unwiderrufliches Angebot zum Abschluss eines Vertrages über einen bestimmten Vertragsgegenstand, die andere Seite bezahlt dafür ein Entgelt als Ausgleich für das vom Optionsgeber getragene Risiko.

#### dd. Das Erlöschen des Antrags

- 53** Gemäß § 146 BGB erlischt der Antrag, wenn er gegenüber dem Antragenden abgelehnt oder wenn er diesem gegenüber nicht innerhalb der Annahmefristen gemäß §§ 147 bis 149 BGB angenommen wird. Ein weiterer Erlöschensgrund ist der Widerruf oder die Rücknahme eines Antrags, für den der Antragende im Sinne von § 145 Hs. 2 BGB die Gebundenheit ausgeschlossen hat. Was genau mit dem „Erlöschen“ des Antrags gemeint ist, kann zweifelhaft sein. Jedenfalls endet die Annahmefähigkeit,<sup>41</sup> was manche dahin interpretieren, dass der Antrag rechtlich nicht mehr existiere.<sup>42</sup>

#### b. Die Annahmeerklärung

- 54** Durch die Erklärung der Annahme macht der Empfänger von der ihm durch den Antrag eingeräumten Rechtsmacht Gebrauch, durch seine Zustimmung zum Antrag das Zustandekommen des Vertrages zu bewirken.

#### aa. Der Tatbestand der Annahmeerklärung

- 55** Der objektive Tatbestand einer Annahmeerklärung liegt nur vor, wenn die Erklärung für den Empfänger erkennbar auf dessen Antrag bezogen ist und es der Sinn der Erklärung ist, dass unmittelbar hierdurch der Vertrag zustande kommen soll.

<sup>38</sup> Bejahend *Flume* AT § 35 I 3 c (S. 642f); *Erman/Armbrüster* § 145 Rdn. 16; verneinend *Palandt/Ellenberger* § 145 Rdn. 4; *Faust* AT § 3 Rdn. 9.

<sup>39</sup> Ebenso *Faust* AT § 3 Rdn. 9.

<sup>40</sup> *Wolf/Neuner* AT § 36 Rdn. 7.

<sup>41</sup> BGH vom 1.6.1994, NJW-RR 1994, 1163 (1164): Angebot mit Ablauf der Frist „erloschen und nicht mehr annahmefähig“; *MüKo/Busche* § 146 Rdn. 4.

<sup>42</sup> *Jauernig/Mansel* § 146 Rdn. 3; *Erman/Armbrüster* § 146 Rdn. 4. So auch BGH vom 11.6.2010, NJW 2010, 2873 (Fall „Verspätete Annahme“, Sachverhalt unten § 30) Rdn. 15: Antrag nach Ablauf der Annahmefrist „nicht mehr existent“.

(1) *Ausgrenzungen*

Die Annahmeerklärung ist insbesondere zu unterscheiden von bloßen Mitteilungen, in denen der Empfänger eines Antrags dessen Eingang bestätigt. Solche Mitteilungen dienen lediglich der Information des anderen, nicht der Herbeiführung einer rechtsgeschäftlichen Rechtsfolge. 56

Besondere Bedeutung hat dies für den online-Abschluss von Verträgen mit einem Unternehmer. Hier ist der Unternehmer gemäß § 312i Abs. 1 Satz 1 Nr. 3 BGB verpflichtet, den Zugang einer online erhaltenen Bestellung des Kunden „unverzüglich auf elektronischem Wege zu bestätigen“. Üblich sind automatisch erzeugte E-Mails, die den Kunden innerhalb von Sekunden oder wenigen Minuten zugehen.<sup>43</sup> Wird die Eingangsbestätigung korrekt formuliert,<sup>44</sup> bringt sie deutlich zum Ausdruck, dass hierin noch keine Entscheidung über die Annahme des Antrags zu sehen ist. 57

(2) *Ausdrückliche/konkludente Erklärung*

Die Annahme kann ausdrücklich („Hiermit nehmen wir Ihren Antrag vom 17. dieses Monats an“) oder **konkludent** erfolgen. Die häufigste Form einer konkludenten Annahmeerklärung liegt in einem Verhalten, mit dem der Antragsempfänger von der ihm vertraglich angebotenen Leistung Gebrauch macht (**Willensbetätigung**) oder seinerseits die verträgsmäßige Leistung erbringt. 58

**Beispiele:** Studentin S füllt sich in der Cafeteria eine Tasse Kaffee aus der Kaffeemaschine ab. – Der hungrige Gast nimmt in einer Gaststätte mehrere Brezeln aus dem auf dem Tisch bereitgestellten Brotkorb, während er auf das Essen wartet. – Der Erwerber einer Eigentumswohnung entnimmt Strom aus dem Anschluss zum Leitungsnetz des Stromversorgers.<sup>45</sup> – Der Empfänger eines Darlehensangebots erbringt die im Vertrag vorgesehenen Ratenzahlungen.<sup>46</sup> 59

Ein viel diskutiertes Sonderproblem ergibt sich, wenn der Empfänger eines Antrags von der Leistung des Antragenden tatsächlich Gebrauch macht, dabei aber ausdrücklich erklärt, den Antrag nicht anzunehmen. Das berühmteste Beispiel bildet der sog. **Hamburger Parkplatzfall** (Sachverhalt unten § 30).<sup>47</sup> Zwar hat das Abstellen eines Kfz auf einem als entgeltpflichtig gekennzeichneten Parkplatz grundsätzlich den Erklärungswert, dass der Benutzer des Parkplatzes das Angebot des Parkplatzbetreibers zum Vertragsschluss annehme. Doch handelt es sich dabei lediglich um einen Schluss vom tatsächlichen Verhalten des Benutzers auf dessen rechtsgeschäftlichen Willen. Die Frage, ob dieser Schluss berechtigt ist, kann aber nicht besser als durch die ausdrückliche entgegenstehende Erklärung. 60

43 So z. B. im Fall BGH vom 26.1.2005, NJW 2005, 976 – „Notebook“ (Sachverhalt unten § 30; näher unten § 14 Rdn. 43 und 52).

44 Die Schwierigkeiten veranschaulicht ein Vergleich der Entscheidungen AG Hamburg vom 21.11.2003, NJW-RR 2004, 1284; AG Hamburg vom 3.12.2003, NJW-RR 2004, 412; LG Hamburg vom 9.7.2004, NJW-RR 2004, 1568. Ausführliche weitere Nachweise zur Rechtsprechung und zu den jeweiligen Formulierungen der automatisch generierten E-Mails bei *Bodenstedt* MMR 2004, 719 ff und in OLG Nürnberg vom 10.6.2009, MMR 2010, 31.

45 BGH vom 2.7.2014, NJW 2014, 3148 Rdn. 10. Zur Realofferte des Stromversorgers oben § 8 Rdn. 33.

46 BGH vom 18.12.2007, NJW-RR 2008, 1436 (1438 Rdn. 38) zu einem verbundenen Kredit, bei dem die Darlehensvaluta der Tilgung einer Kaufpreisschuld des Darlehensnehmers dient und unmittelbar an den Verkäufer ausgekehrt wird.

47 BGH vom 14.7.1956, BGHZ 21, 319 = NJW 1956, 1475; dazu *Petersen* Jura 2011, 907 (907 f).

### 3. Kapitel: Verträge

rung des Benutzers geklärt werden. Die ausdrückliche Erklärung lässt für eine anders geartete Interpretation des Verhaltens keinen Raum.<sup>48</sup>

- 61 Der BGH teilt im Ausgangspunkt die Auffassung, dass es an einer konkludenten Willenserklärung fehle, wenn das Verhalten einer Person zwar an sich den Schluss auf einen rechtsgeschäftlichen Willen zulasse, die Person dabei aber ausdrücklich erkläre, diesen Willen nicht zu haben. Wirkungslos sei dieser Vorbehalt aber, wenn aus dem Verhalten der Person *notwendigerweise* auf einen bestimmten rechtsgeschäftlichen Willen geschlossen werden müsse, wenn also deren Handlungsweise eine andere Deutung nicht zulasse (sog. **protestatio facto contraria**).<sup>49</sup> Die Unterscheidung ist verführerisch einleuchtend, argumentativ dennoch nicht überzeugend, weil es an einer Begründung dafür fehlt, *warum* in den Fällen der behaupteten Wirkungslosigkeit des ausdrücklichen Vorbehalts „notwendigerweise“ auf einen rechtsgeschäftlichen Willen geschlossen werden müsse, *warum* das Verhalten trotz des ausdrücklichen Vorbehalts eine „andere Deutung“ nicht zulasse. Die andere Deutung folgt daraus, dass derjenige, der ausdrücklich einen Vertragsschluss ablehnt, von seiner negativen Vertragsfreiheit Gebrauch macht.<sup>50</sup> Wer einen Vertragsschluss ablehnt und dennoch die angebotene Leistung in Anspruch nimmt, verhält sich in aller Regel rechtswidrig und unterliegt den hierfür geltenden Sanktionen (insbesondere des Bereicherungs- und Deliktsrechts),<sup>51</sup> schließt aber keinen Vertrag, der diese Sanktionen außer Kraft setzt.<sup>52</sup>

#### (3) Schweigen als Annahme?

- 62 Erhebliche praktische Bedeutung hat die Frage, ob bloßes Schweigen auf einen Antrag als Zustimmung zum Vertragsschluss gewertet werden kann.

#### (a) Der Grundsatz: Schweigen gilt nicht als Zustimmung

- 63 Ausgangspunkt ist der Grundsatz: Schweigen hat nicht die Erklärungsbedeutung einer rechtsgeschäftlichen Zustimmung (**qui tacet consentire non videtur**). Dieser Grundsatz folgt aus der negativen Vertragsfreiheit. Bloßes Nichts-Tun darf grundsätzlich nicht zu rechtsgeschäftlichen Rechtsfolgen führen. Insbesondere darf niemand einseitig unter Erklärungszwang gesetzt werden, indem ihm mitgeteilt wird, Schweigen gelte als Annahme eines Angebots.
- 64 **Beispiel:** „Wenn ich von Ihnen nicht binnen zwei Wochen ausdrücklich etwas anderes höre, gehe ich davon aus, dass Sie mein einmalig günstiges Angebot angenommen haben.“ – „Dieses Angebot gilt als angenommen, wenn es nicht innerhalb von zwei Wochen schriftlich abgelehnt wird“. Derartige einseitige Erklärungen des Offerenten können an der Rechtslage nichts ändern. Wenn der Empfänger schweigt, ist das Angebot nicht angenommen.
- 65 Dieser Grundsatz gilt auch in den Fällen der **Zusendung unbestellter Waren** und der **Erbringung unbestellter Leistungen**. Geschieht dies durch einen Unternehmer (§ 14

48 Eindringlich Köhler JZ 1981, 464 (465 ff) – Zur Gegenposition Flume AT § 5, 5 (S. 76); Erman/Armbrüster vor § 145 Rdn. 43; MüKo/Armbrüster vor § 116 Rdn. 10; MüKo/Busche § 133 Rdn. 56 („Taten können Worte Lügen strafen“).

49 BGH vom 2.7.1986, NJW-RR 1986, 1496 (1497).

50 Staudinger/Singer (2011) § 133 Rdn. 59f; abweichend (Einschränkung der Privatautonomie) Medicus/Petersen Bürgerliches Recht Rdn. 191.

51 Köhler JZ 1981, 464 (467); ders. AT § 8 Rdn. 29; Jauernig/Mansel vor §§ 145–157, Rdn. 20; Faust AT § 3 Rdn. 2; S. Lorenz GS Unberath (2015) 293 (295).

52 Anders BGH vom 9.5.2000, NJW 2000, 3429 (Verbleiben eines Patienten in stationärer Behandlung unter Ablehnung eines Vertragsschlusses); BGH vom 30.4.2003, NJW 2003, 3131 (Wasserversorgungsvertrag); BGH vom 2.7.2014, NJW 2014, 3148 Rdn. 10 (Stromversorgungsvertrag).

BGB) an einen Verbraucher (§ 13 BGB), so ordnet § 241 a Abs. 1 BGB an, dass hierdurch „ein Anspruch gegen den Verbraucher nicht begründet“ wird. Die sehr weite Fassung der Vorschrift soll nach dem Willen des Gesetzgebers klar stellen, dass keinerlei Anspruch gegen den Verbraucher entsteht. Selbst Aneignungshandlungen des Verbrauchers sollen nicht als konkludente Annahme des Vertragsangebots gewertet werden. Gesetzliche Ansprüche auf Herausgabe (§ 985 BGB) oder Wertersatz (§§ 812, 818 BGB) sollen – wie sich im Umkehrschluss aus § 241 a Abs. 2 BGB ergibt – ausgeschlossen sein.

**Beispiel:** Student S erhält von Hersteller H unaufgefordert ein Wellenschliff-Brotmesser zugeschliffen, das 19,95 Euro kosten soll. Im Anschreiben bittet H „für den unwahrscheinlichen Fall, dass Sie bei diesem einmaligen Angebot nicht zugreifen wollen“, um Rücksendung binnen zwei Wochen; andernfalls gehe er davon aus, dass H das Angebot angenommen habe, und bitte um Überweisung des Kaufpreises auf das Konto x bei der y-Bank. S, immer knapp bei Kasse, findet es schade, das Messer, wenn es nun schon mal in seinem Haushalt ist, nicht zu verwenden. Bezahlen will er dafür aber nicht.

66

Gegen diese Interpretation des § 241 a BGB wird im Schrifttum der Einwand erhoben, sie sei mit der VerbraucherrechteRL<sup>53</sup>, deren Umsetzung die Vorschrift nunmehr dient,<sup>54</sup> nicht zu vereinbaren, da die Richtlinie **vollharmonisiert** sei<sup>55</sup> und somit nicht zulasse, dass der nationale Gesetzgeber im Verbraucherschutz über die Richtlinie hinausgehe.<sup>56</sup> Für den Ausschluss *gesetzlicher* Ansprüche ist dieser Einwand indessen nicht anzuerkennen, da die Richtlinie nur die vertragsrechtlichen Folgen der Zusendung unbestellter Waren regelt und somit auch die Vollharmonisierung auf diesen Bereich beschränkt ist (vgl. unten § 23 Rdn. 66a).<sup>57</sup> Ob die *Ingebrauchnahme* unbestellt zugesandter Waren den Erklärungswert einer Annahme hat, ist dagegen eine vertragsrechtliche Frage, die in den Regelungsbereich der Richtlinie fällt. Daher kann § 241 a BGB eine Auslegung der Ingebrauchnahme der Sache durch den Verbraucher im Sinne einer konkludenten Annahme nicht schlechterdings ausschließen.<sup>58</sup>

67

#### (b) Die Ausnahmen

Schweigen hat ausnahmsweise die Bedeutung einer Zustimmung zum Vertragsschluss, wenn die Parteien dies vereinbart haben oder das Gesetz dies so anordnet.

68

#### (aa) Verabredete Erklärungsbedeutung des Schweigens

Personen, die miteinander in Geschäftsbeziehungen stehen und regelmäßig die Angebote der anderen Seite annehmen, mögen es als einfacher empfinden, wenn sie nur im Ausnahmefall Angebote ablehnen, während im Übrigen Schweigen als Annahme gelten soll. Das kann selbstverständlich vereinbart werden.<sup>59</sup> Ein Verstoß gegen die Grundsätze der

69

53 Richtlinie 2011/83/EU vom 25.10.2011 – VRRRL.

54 Der anders lautende amtliche Hinweis zu § 241 a BGB in der seit 13.6.2014 geltenden Fassung beruht auf einem Redaktionsversehen.

55 Art. 4 VRRRL. Zum Begriff der Vollharmonisierung unten § 23 Rdn. 66.

56 Köhler FS Gottwald (2014) 363 ff; ders. JuS 2014, 865 (868).

57 Gsell, in: Staudinger/Eckpfeiler (2014) L. Rdn. 37; Jessica Schmidt GPR 2014, 73 (78); siehe auch unten § 23 Rdn. 66.

58 In der Wertung ähnlich Rüthers/Stadler § 17 Rdn. 25: Der Empfänger, der die Sache behalte und nutze, sei „kaum schutzwürdig gegenüber der Kaufpreisforderung des Unternehmers“.

59 Medicus AT Rdn. 393.

### 3. Kapitel: Verträge

Privatautonomie liegt hierin nicht, da die Erklärungsbedeutung des Schweigens auf dem gemeinsamen Willen beider Seiten beruht.

#### *(bb) Gesetzlich normierte Erklärungsbedeutung des Schweigens*

- 70** Das BGB enthält nur eine einzige Vorschrift, nach der Schweigen als Zustimmung zu einem Vertragsantrag gilt, nämlich § 516 Abs. 2 Satz 2 BGB. Der Anwendungsbereich der Norm ist äußerst klein.
- 71** Nach dem BGB muss niemand sich etwas gegen seinen Willen schenken lassen. Eine unentgeltliche Zuwendung erfordert nach § 516 Abs. 1 BGB eine vertragliche Einigung zwischen Schenker und Beschenktem. Nun kann man aber einem anderen eine als unentgeltlich gedachte Zuwendung machen, ohne sich zuvor mit ihm über die Unentgeltlichkeit zu einigen. Man überweist z.B. 1.000 Euro auf dessen Konto oder bezahlt für ihn eine Schuld. Hierin liegt dann zugleich ein (konkludenter) Antrag auf Abschluss eines Schenkungsvertrages.<sup>60</sup> Der Zuwendende kann gemäß § 516 Abs. 2 Satz 1 BGB den anderen zur Erklärung über die Annahme des Schenkungsangebots binnen bestimmter Frist auffordern. Äußert sich der andere in der Frist nicht, gilt das Schweigen gemäß § 516 Abs. 2 Satz 2 BGB als Zustimmung. Der Gesetzgeber ließ sich von der Erwägung leiten, dass Schenkungen im Leben nur selten nicht angenommen werden.<sup>61</sup>
- 72** Außerhalb des BGB ist insbesondere § 362 HGB zu nennen. Die Tatbestandsvoraussetzungen dieser Norm sind den Darstellungen des Handelsrechts zu entnehmen. Hier ist nur der regelungstechnische Unterschied zu § 663 BGB hervorzuheben: § 362 HGB ordnet an, dass Schweigen als Zustimmung zu dem Antrag gilt, fingiert also die für das Zustandekommen des Vertrages notwendige Annahmeerklärung. § 663 BGB stellt dagegen eine Pflicht auf, im Falle der Ablehnung den Antragenden unverzüglich hierüber zu informieren. Die Verletzung dieser Pflicht verpflichtet gemäß § 280 Abs. 1 BGB zum Schadensersatz.
- 73** Gemäß § 5 Abs. 3 Satz 1 PflVG gilt ein Antrag auf Abschluss eines Kfz-Haftpflichtversicherungsvertrages als angenommen, wenn der Versicherer ihn nicht binnen zwei Wochen seit Eingang ablehnt. Die Vorschrift ist im Zusammenhang mit dem Abschlusszwang zu sehen, dem das Versicherungsunternehmen unterliegt (§ 5 Abs. 2 PflVG, oben § 1 Rdn. 38).

#### *(cc) Ausgrenzung: Das Schweigen auf ein kaufmännisches Bestätigungsschreiben*

- 74** Im Schrifttum werden gelegentlich die von der Rechtsprechung entwickelten Grundsätze zum Schweigen auf ein kaufmännisches Bestätigungsschreiben (unten Rdn. 204 ff) als Beispiel dafür genannt, dass das Schweigen kraft gesetzlicher Anordnung die Bedeutung der Annahme eines Antrags haben könne.<sup>62</sup> Dem ist nicht zu folgen.
- 75** Die Grundsätze zum Bestätigungsschreiben knüpfen an die Tatsache oder zumindest die subjektive Vorstellung der Parteien an, dass ein Vertrag geschlossen worden ist. Also kann das Bestätigungsschreiben nicht den Sinn eines Antrags auf Abschluss des Vertrages haben, der Gegenstand der Bestätigung ist, und dementsprechend kann das Schweigen auf das Schreiben nicht den Sinn der Annahme eines Antrags auf Abschluss dieses Vertrages haben. Es bleibt nur, in einem Bestätigungsschreiben den Antrag auf Abschluss

<sup>60</sup> So die dem § 516 Abs. 2 BGB zugrunde liegende Konstruktion, die sich freilich nur durchhalten lässt, wenn man annimmt, dass die §§ 147 ff BGB durch § 516 Abs. 2 BGB als Sonderregelung verdrängt werden. Näher mit Nachweisen Erman/Herrmann § 516 Rdn. 18.

<sup>61</sup> Prot. II, S. 8 = Mugdan II, S. 739.

<sup>62</sup> Fezer, Klausurenkurs im Handelsrecht (4. Aufl. 2006) Rdn. 148.

eines Änderungsvertrages für den Fall zu sehen, dass der Inhalt des Bestätigungsschreibens vom Inhalt der getroffenen Vereinbarungen abweicht. So ist das Bestätigungsschreiben aber nicht gemeint. Es zielt nicht auf die rechtsgeschäftliche Begründung anderer Rechtsfolgen als diejenigen, die sich aus dem bestätigten Vertrag ergeben, vielmehr teilt der Bestätigende darin dem Empfänger seine Auffassung über das Zustandekommen und den Inhalt des geschlossenen Vertrages mit.<sup>63</sup> Da das Bestätigungsschreiben somit nicht als ein Angebot angesehen werden kann, ist eine Deutung des Schweigens als Annahme ausgeschlossen (Einzelheiten zum Bestätigungsschreiben unten Rdn. 204 ff).

(4) Annahme durch „sozialtypisches Verhalten“?

Im „**Hamburger Parkplatzfall**“ (oben Rdn. 60 f; Sachverhalt unten § 30) hat der BGH die Auffassung vertreten, für die Entstehung vertraglicher Ansprüche sei bei der tatsächlichen Inanspruchnahme von Leistungen, die einem breiten, anonymen Publikum zugänglich gemacht werden, eine Willenserklärung des Nutznießers der Leistung nicht erforderlich. Der BGH ließ es genügen, dass der „sozialtypische Sinn“ der Inanspruchnahme solcher Leistungen darin liege, die Vertragsbedingungen des Anbieters zu akzeptieren.<sup>64</sup> Die Begründung wird zu Recht im Schrifttum abgelehnt, da sie mit elementaren Grundsätzen der Privatautonomie nicht zu vereinbaren ist.<sup>65</sup>

76

(5) Verspätete und modifizierte Annahme

§ 150 BGB regelt zwei Fälle, in denen der Antragsempfänger zwar erklärt, den Antrag anzunehmen, die Erklärung aber nicht die Wirkung hat, dass der Vertrag zustande kommt.

77

(a) Verspätete Annahme (§ 150 Abs. 1 BGB)

Geht die Annahmeerklärung dem Antragenden erst nach Ablauf der Annahmefrist zu, ist der Antrag erloschen (oben Rdn. 53). Die Annahme geht also ins Leere. Bei diesem negativen Ergebnis lässt es das Gesetz aber nicht bewenden. Es will das Zustandekommen von Verträgen fördern und beschleunigen und sieht deshalb vor, dass die als solche wirkungslose Annahmeerklärung als neuer Antrag gilt, § 150 Abs. 1 BGB. Immerhin zeigt die verspätete Annahmeerklärung, dass der Antragsempfänger zum Vertragsschluss kommen möchte. Hat der (ursprüngliche) Antragende noch nicht anders disponiert, wird er hierauf gerne eingehen.

78

§ 150 Abs. 1 BGB kann zu nicht unproblematischen Konsequenzen führen, wenn den Kontrahenten die Verspätung der Erklärung der Annahme nicht bewusst ist, etwa, weil sie eine bestimmte Annah-

79

63 BGH vom 27.1.1965, NJW 1965, 965; Petersen JURA 2003, 687 (691).

64 BGH vom 14.7.1956, BGHZ 21, 319 (333 ff) = NJW 1956, 1475 (1476). In späteren Entscheidungen formuliert der BGH, dass die normierende Kraft der Verkehrssitte einem sozialtypischen Verhalten den Sinn einer echten Willenserklärung zumessen könne: BGH vom 16.12.1964, NJW 1965, 387 (388); BGH vom 26.1.2005, NJW-RR 2005, 639 (640); BGH vom 2.7.2014, NJW 2014, 3148 Rdn. 10; BGH vom 22.7.2014, NJW 2014, 3150 Rdn. 12.

65 Flume AT § 8, 2 (S. 97 ff); Wolf/Neuner AT § 37 Rdn. 47; Rüthers/Stadler AT § 19 Rdn. 34; Brehm AT Rdn. 534 („widerspricht den fundamentalen Grundsätzen der Rechtsgeschäftslehre“); MüKo/Busche § 147 Rdn. 5; Jauernig/Mansel Vorbem. §§ 145–157 Rdn. 20 („mit dem BGB unvereinbar“).



### 3. Kapitel: Verträge

mefrist vereinbart hatten, die einer rechtlichen Überprüfung nicht standhält.<sup>66</sup> Die Kontrahenten sehen den Vertrag als geschlossen an. Der ursprüngliche Antragende erkennt nicht, dass er Empfänger eines neuen Antrags ist und die Annahme erklären muss, um zum Vertragsschluss zu kommen. Die Überzeugung der Kontrahenten, es sei „alles in Ordnung“, steht jeglicher Interpretation des Verhaltens des Empfängers eines gemäß § 150 Abs. 1 BGB neuen Antrags im Sinne einer konkludenten Annahme entgegen (oben § 5 Rdn. 7f). Der BGH hat es abgelehnt, § 150 Abs. 1 BGB dahin zu interpretieren, dass mit dem Ablaufe der Annahmefrist nur die Gebundenheit des Antragenden, nicht aber die Annahmefähigkeit des Antrags ende.<sup>67</sup>

#### *(b) Modifizierte Annahme (§ 150 Abs. 2 BGB)*

- 80** Eine ähnliche Regelungstechnik liegt auch § 150 Abs. 2 BGB zugrunde. Wird die Annahme „unter Erweiterungen, Einschränkungen oder sonstigen Änderungen“ erklärt, so ordnet das Gesetz im ersten Schritt an, dass eine solche modifizierte Annahme als Ablehnung des Antrags gilt. Der Antrag erlischt somit (§ 146 Var. 1 BGB). Im zweiten Schritt sieht das Gesetz vor, dass die modifizierte Annahme als neuer Antrag gilt. Die Rollen werden getauscht,<sup>68</sup> das Spiel geht weiter.
- 81** **Beispiel:** A übersendet B ein schriftliches Angebot zur Durchführung bestimmter Malerarbeiten zum Gesamtpreis von 7.500 Euro. B streicht die Entgeltangabe aus, setzt „6.000 Euro“ an deren Stelle, unterschreibt und schickt das Schreiben so zurück an A.
- 82** § 150 Abs. 2 BGB ist nicht einschlägig, wenn im Rahmen von Vertragsverhandlungen beide Seiten noch darum ringen, sich auf einen gemeinsamen Vertragsentwurf zu einigen. Werden hier einzelne Bestimmungen von einer Seite vorgeschlagen und von der anderen Seite verworfen, macht nicht jede Seite der anderen jeweils ein Angebot zum Abschluss eines Vertrages. Über den Abschluss des Vertrages wird erst entschieden, wenn der gesamte Vertragstext ausgehandelt ist. Dies stellt auch § 154 Abs. 1 Satz 2 BGB klar (unten Rdn. 97ff).
- 83** § 150 Abs. 2 BGB ist nur anwendbar, wenn die Erklärung den Sinn hat, gerade die **Abweichung** vom Antrag zum Ausdruck zu bringen, indem sie das „**Ja**“ zum Vertragsschluss mit einem „**aber**“ verbindet. Nur dann nämlich vermag derjenige, der den ursprünglichen Antrag abgegeben hat, zu erkennen, dass sein Antrag nicht angenommen worden ist und er sich nun seinerseits in der Rolle des Empfängers eines neuen Antrags befindet, der die Entscheidung über dessen Annahme zu treffen hat. Die Rechtsprechung fordert deshalb zu Recht, dass der Wille zur Abweichung vom ursprünglichen Antrag in der modifizierten Annahme klar und eindeutig zum Ausdruck kommen müsse.<sup>69</sup>
- 84** Selbst wenn die Annahmeerklärung im Wortlaut von dem Antrag abweicht, kann deshalb eine Anwendung des § 150 Abs. 2 BGB ausscheiden. Wenn der Antragende (aufgrund von Vorverhandlungen oder ähnlicher Umstände) weiß oder wissen muss, dass der Antragsempfänger mit der vom Antrag abweichenden Formulierung der Annahmeerklärung nur das zum Ausdruck bringt, was er als Inhalt und Sinn des Antrags versteht, hat die vom Antrag abweichende Formulierung nicht den Sinn zu erklären, dass der Antragsempfänger nur zu vom Antrag abweichenden Bedingungen den Vertrag schließen wolle. Vielmehr kommt aufgrund eines normativen Konsenses (unten Rdn. 157ff) ein Vertrag mit

<sup>66</sup> BGH vom 11.6.2010, NJW 2010, 2873 (Fall „Verspätete Annahme“, Sachverhalt unten § 30).

Bedenken gegen das Ergebnis der Entscheidung des BGH auch bei *Faust* JuS 2010, 1106 (1108).

<sup>67</sup> BGH aaO (vorige Fn.) Rdn. 15.

<sup>68</sup> *Flume* AT § 35 II 1 (S. 650).

<sup>69</sup> BGH vom 18.11.1982, WM 1983, 313 (314); BGH vom 14.5.2014, NJW 2014, 2100 Rdn. 17.

dem Inhalt zustande, den der Angebotsempfänger dem Angebot entnommen hat und entnehmen durfte.

**Beispiel:** Im Fall „**Original-IBM-Druckkassetten**“ (Sachverhalt unten § 30) betraf die Ausschreibung der Bekl. nicht irgendwelche Druckkassetten, die in IBM-Druckern verwendet werden können, sondern ausdrücklich nur Originalware des Herstellers IBM. Hierauf nahm die Kl. Bezug, indem sie „das gewünschte Angebot“ unterbreitete, dabei alle Eckdaten der Ausschreibung wiederholte, zwar das Wort „Original“ wegließ, aber doch den Rücksendungsumschlag mit dem aufgedruckten „Originalware“-Text verwendete. Die Bekl. erteilte ihr daraufhin den Auftrag zur Lieferung von „Original-IBM-Druckkassetten“ lt. Ausschreibung. Obwohl die Annahmeerklärung verbal sich nicht mit dem Angebot deckte, durfte die Kl. dies nicht als eine modifizierte Annahme im Sinne von § 150 Abs. 2 BGB und somit als Ablehnung ihres Angebots verstehen.<sup>70</sup> Sie musste vielmehr davon ausgehen, dass die Bekl. die versteckte Abweichung des Angebots gar nicht bemerkt hatte und die auf „Original-IBM-Druckkassetten“ lautende Annahme Ausdruck dieses Verständnisses des Angebots war.

85

Im Übrigen kann die Auslegung des Antrags ergeben, dass die Modifizierung innerhalb des rechtsgeschäftlichen Willens des Antragenden liegt. Dann bedarf es nicht einer Anwendung des § 150 Abs. 2 BGB, um die Selbstbestimmung des Antragenden zu wahren. Dies wird vielfach bei Abweichungen *zugunsten* des Antragenden anzunehmen sein.

86

**Beispiel:** K macht kurz vor Geschäftsschluss im Lebensmittelmarkt des V ihre Wochenendeinkäufe. Sie nimmt u.a. zwei Schalen frische Früchte mit, die mit 1,99 Euro ausgezeichnet sind. Zuhause stellt sie beim Überprüfen der Rechnung fest, dass ihr für die Schalen nur jeweils 0,99 Euro berechnet worden sind. Die Scannerkasse hat eine kurzfristige Preisherabsetzung berücksichtigt, während am Regal selbst die Preisschilder noch nicht korrigiert worden waren. Hier wird man ohne weiteres davon ausgehen können, dass K die Früchte zu dem im Laden ausgezeichneten *oder* einem etwaigen günstigeren Preis erwerben wollte. Nimmt man an, dass K den Antrag macht, indem sie die Ware auf den Kassentisch legt,<sup>71</sup> so deckt ihr so ausgelegter Antrag die Annahme zu 0,99 Euro durch die Kassenanstellung.

87

## bb. Die Wirksamkeit der Annahmeerklärung

Auf die Wirksamkeit der Annahmeerklärung ist hier nur einzugehen, soweit sich Besonderheiten gegenüber der Wirksamkeit von Willenserklärungen allgemein (oben § 6 Rdn. 9 ff und 74 ff) und der Wirksamkeit des Antrags (oben Rdn. 34 ff) ergeben.

88

Die wichtigste Abweichung gegenüber den allgemeinen Vorschriften besteht darin, dass die Annahme unter bestimmten Voraussetzungen schon mit *Abgabe* der Erklärung (und nicht erst mit deren Zugang, § 130 BGB) wirksam werden kann. Dies ergibt sich aus § 151 Satz 1 Hs. 2 BGB. Die Vorschrift verzichtet nicht etwa überhaupt auf das Erfordernis der Annahme, sondern nur darauf, dass die Annahme „*dem Antragenden gegenüber erklärt*“ wird, wenn eine solche Erklärung nach der Verkehrssitte nicht zu erwarten ist oder der Antragende hierauf verzichtet hat. Unter den vom Gesetz genannten Voraussetzungen bedarf es „lediglich der Annahme als solcher, d.h. eines als Willensbetätigung zu wertenden, nach außen hervortretenden Verhaltens des Angebotsempfängers, aus dem sich dessen Annahmewille unzweideutig ergibt“.<sup>72</sup> Die Annahmeerklärung gemäß § 151

89

<sup>70</sup> Anders OLG Hamm vom 8.9.1997, NJW-RR 1998, 1747 (1748: Bejahung sowohl des § 150 Abs. 2 BGB wie eines Dissenses).

<sup>71</sup> Hierzu oben Rdn. 27.

<sup>72</sup> BGH vom 28.3.1990, BGHZ 111, 97 (101) = NJW 1990, 1655 (1656).

### 3. Kapitel: Verträge

Satz 1 Hs. 2 BGB ist *nicht empfangsbedürftig*,<sup>73</sup> Zugang für deren Wirksamkeit somit nicht erforderlich.

- 90 Beispiel „Larenz AT antiquarisch“:** K schreibt V, er wolle das von V in einer Zeitungsanzeige inserierte antiquarische Buch „Larenz, Allgemeiner Teil des deutschen Bürgerlichen Rechts, 7. Aufl. 1989, mit handschriftlicher Widmung des Autors“ zu dem von V inserierten Preis und Lieferung per Nachnahme kaufen. Im Verkehr wird nicht erwartet, dass V zunächst in einem gesonderten Schreiben oder auf andere Weise dem K gegenüber die Annahme des Antrags erklärt. Es genügt, dass V die Bestellung ausführt. Macht V das Buch aufgrund der Bestellung des K versandfertig,<sup>74</sup> liegt hierin die Erklärung der Annahme. In diesem Moment kommt der Vertrag mit K zustande.
- 91** Die Vorverlagerung des Vertragsschlusses, die durch § 151 Satz 1 Hs. 2 BGB erreicht wird, macht insofern guten Sinn, als dadurch bei einem Distanzkauf die Versendung der Sache schon unter dem Schutz des Vertragsrechts erfolgt. Das Vertragsrecht enthält insbesondere Regelungen dazu, wer den wirtschaftlichen Verlust zu tragen hat, falls die Sache auf dem Transport zerstört wird.
- 92** Im **Beispiel „Larenz AT antiquarisch“** (oben Rdn. 90) wird das an K verkaufte Exemplar des „Larenz AT“ durch einen Paketdienst in einem LKW befördert. Der Wagen erleidet einen Unfall, fängt Feuer und brennt vollständig aus. Von allen beförderten Paketen bleibt nur Asche übrig. Hierdurch wird der Verkäufer von seiner Verpflichtung frei, den „Larenz AT“ dem Käufer zu übereignen und zu übergeben (§ 275 Abs. 1 BGB).<sup>75</sup> Zugleich verliert der Verkäufer grundsätzlich den Anspruch auf den Kaufpreis (§ 326 Abs. 1 BGB). Anders, wenn die Voraussetzungen des § 447 Abs. 1 BGB vorliegen: Ist die Gefahr übergegangen,<sup>76</sup> trägt der Käufer den wirtschaftlichen Verlust aus dem Untergang der Sache. Technisch geschieht dies dadurch, dass der Käufer (abweichend von § 326 Abs. 1 BGB) zur Zahlung des Kaufpreises verpflichtet bleibt, obwohl er die (nicht mehr existente) Kaufsache nicht erhält. § 447 BGB gilt freilich nicht, wenn ein Verbrauchsgüterkauf im Sinne des § 475 Abs. 1 BGB vorliegt (§ 475 Abs. 2 BGB). Erwirbt K das antiquarische Buch als Verbraucher von einem Unternehmer (§§ 13, 14 BGB, oben § 2 Rdn. 27 ff), so ist § 447 BGB nicht anzuwenden und K wird von der Verpflichtung zur Zahlung des Kaufpreises durch den Untergang des Buches gemäß § 326 Abs. 1 Satz 1 BGB frei.
- 93** Der abgekürzte Vertragsschlussmechanismus des § 151 Satz 1 Hs. 2 BGB kann Gefahren für den Antragsempfänger begründen, die der Antragende zudem einseitig auslösen kann, indem er auf den Zugang einer Annahmeerklärung verzichtet.
- 94 Beispiel „Erlassfalle“:**<sup>77</sup> S schuldet dem G eine beträchtliche Summe Geldes, deren genaue Höhe zwischen beiden streitig ist. Er bietet in einem Schreiben dem G an, einen (kleinen) Teil der Schulden in mehreren Raten zu begleichen, wenn die Sache damit auch für G erledigt sei, und fügt einen Verrechnungsscheck über die erste Rate bei. Zugleich verzichtet er in dem Brief auf eine Rückäußerung von G; er wolle nur noch seinen Frieden haben. G, der endlich einen Scheck von S in den Händen hält, reicht den Scheck sofort seiner Bank zum Einzug ein und antwortet dem S schriftlich, sein Vorschlag sei eine Zumutung, auf die er selbstverständlich nicht eingehe. S ist der Meinung, dass G durch die Scheckeinreichung seinen Vergleichsvorschlag gemäß § 151 Satz 1 Hs. 2 BGB angenommen habe.

<sup>73</sup> Ganz h.M.: BGH vom 21.10.2004, NJW 2004, 3699; MüKo/Busche § 151 Rdn. 3; Bork AT Rdn. 749; Medicus AT Rdn. 382; abweichend Flume AT § 35 II, 3 (S. 655: Annahmeerklärung entbehrlich).

<sup>74</sup> Zu Recht stellt Faust AT § 3 Rdn. 20 auf dieses Kriterium ab, da schon hierin zum Ausdruck kommt, dass V die Bestellung des K ausführt, also dem Antrag entsprechen will. Die überwiegende Gegenmeinung hält die Versendung der bestellten Sache für maßgeblich.

<sup>75</sup> Ein antiquarisches Buch mit persönlicher Widmung des Autors stellt ein Einzelstück dar, das durch kein anderes Exemplar ersetzt werden kann.

<sup>76</sup> Zum Begriff des Übergangs der Gefahr Leenen JuS 2008, 577 (581 ff).

<sup>77</sup> Vorlage: BGH vom 28.3.1990, BGHZ 111, 97 = NJW 1990, 1655; hierzu Medicus AT Rdn. 393 a; Faust AT § 3 Rdn. 21.

Die Rechtsprechung stellt in solchen Fällen zu Recht hohe Anforderungen an ein Verhalten des Antragsempfängers, das den Willen zur Annahme des Antrags zum Ausdruck bringe. Die bloße Einziehung des beigefügten Schecks (zu der ein Gläubiger ja berechtigt ist) genügt nicht, wenn das Gesamtverhalten des Gläubigers eine andere Sprache spricht.<sup>78</sup>

### cc. Die Wirkung der Annahmeerklärung

Die rechtliche Wirkung der Annahme scheint sich ganz unmissverständlich aus dem ersten Halbsatz des § 151 Satz 1 BGB zu ergeben: Durch die Annahme des Antrags kommt der Vertrag zustande. Dies ist der Grundsatz, doch bleibt ein Vorbehalt zu machen. In seltenen Fällen zeigt sich, dass die Parteien in ihren Erklärungen keine Einigung erzielt haben, und hieran kann das Zustandekommen des Vertrages scheitern (unten Rdn. 165 ff).

## 2. Der Abschluss des Vertrages durch gemeinsame Zustimmung zu einem Vertragstext

Häufig werden Verträge anders als im Wege von Antrag und Annahme geschlossen. Statt es *einer* Seite zu überlassen, das gesamte Vertragsprogramm zu entwerfen, und dann die *andere* Seite darüber entscheiden zu lassen, ob diese Regelung gelten soll, setzen sich die Partner eines in Aussicht genommenen Vertrages *gemeinsam* an einen Tisch, handeln miteinander aus, welche Regelung sie treffen wollen, halten die gefundenen Vereinbarungen schriftlich fest, und unterzeichnen dann eine Vertragsurkunde mit diesem Text.<sup>79</sup> Das Verfahren bringt besonders sinnfällig zum Ausdruck, worum es beim Vertrag eigentlich geht: Beide Seiten müssen versuchen, ihre unterschiedlichen Interessen zum Ausgleich zu bringen („sich vertragen“), und wenn sie schließlich einen Kompromiss gefunden haben, auf den sie sich einigen können, bleibt ihnen noch die Entscheidung, ob sie diese Regelung nun auch in Geltung setzen wollen.

Wirtschaftlich bedeutende Verträge mit komplexem Inhalt werden typischerweise in dieser Technik geschlossen.<sup>80</sup> Aber auch im alltäglichen Leben ist diese Technik des Vertragsschlusses weit verbreitet. Der Ablauf dieser Vertragsschlusstechnik gliedert sich (wie bei Antrag und Annahme) in zwei Phasen, an der aber (anders als bei Antrag und Annahme) typischerweise *beide* Seiten beteiligt sind. Zunächst muss das Vertragsprogramm dem Inhalt nach ausgearbeitet werden, dann kann es in Geltung gesetzt werden.

<sup>78</sup> BGH vom 28.3.1990, BGHZ 111, 97 (102) = NJW 1990, 1655 (1656); BGH vom 10.5.2001, NJW 2001, 2324 (2324f) mit Besprechung *Kleinschmidt* NJW 2002, 346; OLG Celle vom 9.1.1992, NJW-RR 1992, 884; Thüringer OLG vom 12.7.2000, OLG-NL 2000, 193; OLG Koblenz vom 21.11.2002, NJW 2003, 758 (759).

<sup>79</sup> Hierzu *U. Huber* RabelsZ Bd. 43 (1979), 412 (445f); *Flume* AT § 34, 2 (S. 619f); *Leenen* AcP Bd. 188 (1988), 381 (399ff); *Bischoff*, Der Vertragsschluss beim verhandelten Vertrag (2001) S. 189ff; *Medicus/Petersen*, Grundwissen zum Bürgerlichen Recht (10. Aufl. 2014) Rdn. 71; *Medicus/Petersen* Bürgerliches Recht Rdn. 45; *Kötz*, Europäisches Vertragsrecht (1996) S. 24f; *ders.*, Vertragsrecht (2. Aufl. 2012) Rdn. 80; *Schiemann*, in: Staudinger/Eckpfeiler (2014) C. Rdn. 63; Palandt/Ellenberger § 145 Rdn. 6; jurisPK-BGB/Backmann § 145 Rdn. 10; *Hellgardt* AcP Bd. 213 (2013) 760 (766).

<sup>80</sup> Eine treffende Würdigung dieser Technik findet sich bei *Rudolf B. Schlesinger*, Formation of Contracts (1968), Bd. 2, S. 1584f: „In the usual negotiation of a large-scale transaction there is no room for offer and acceptance“.

- 99** Die §§ 145–153 BGB, denen als Leitbild der Vertragsschluss unter Abwesenden zugrunde liegt, passen für den Abschluss derartiger gemeinsam ausgehandelter oder im Einverständnis beider Seiten von einem Dritten ausgearbeiteter Verträge grundsätzlich nicht.<sup>81</sup> So lässt sich die für Verhandlungen typische Ablehnung von Regelungsvorschlägen der Gegenseite verbunden mit dem Vorbringen eigener Positionen nicht mit § 150 Abs. 2 BGB erfassen.<sup>82</sup> Wichtige Regelungen für diese Vertragstechnik lassen sich aber den §§ 154 und 155 BGB entnehmen.<sup>83</sup>

#### **a. Die Festlegung des Inhalts der vertraglichen Regelung**

- 100** Die Ausarbeitung des Inhalts der vertraglichen Regelung erfolgt oft in der Weise, dass beide Seiten sich von einem Dritten einen Entwurf erstellen lassen, den sie dann gemeinsam mit dem Dritten erörtern und eventuell in einigen Punkten modifizieren. Geradezu typisch ist diese Vorgehensweise beim Abschluss von Grundstückskaufverträgen, die gemäß § 311b Abs. 1 Satz 1 BGB notarieller Beurkundung bedürfen. Der Notar klärt mit den Parteien die wichtigsten Eckdaten des Vertrages, greift zu den Details auf Vertragsmuster zurück, und erarbeitet so einen Vertragstext, den er in der Verhandlung den Parteien vorliest und erläutert, wobei stets noch Änderungen vorgenommen werden können (unten § 9 Rdn. 187 ff). Beim Abschluss von Mietverträgen oder von Kaufverträgen über gebrauchte Kraftfahrzeuge bedienen sich die Kontrahenten vielfach der hierzu im Handel und bei Verbänden erhältlichen Formulare, die nur noch in einigen Punkten ergänzt werden müssen. Alle diese Vertragsmuster sind nicht nach dem Schema von Antrag und Annahme aufgebaut, sondern enthalten den Text des Vertrages, der zwischen den Beteiligten geschlossen werden soll.
- 101** Bei großen Transaktionen werden Verträge Schritt für Schritt erarbeitet. Hat man sich zu einem Punkt auf eine bestimmte Regelung geeinigt, wird der Text festgehalten und von beiden Seiten mit einem Namenskürzel versehen („Punktation“). Damit wird lediglich das Verhandlungsergebnis zu diesem Punkt festgestellt, nicht aber schon etwa als Regelung in Geltung gesetzt – die Parteien befinden sich ja noch in der Phase der Vorbereitung des Gesamttextes des Vertrages. Eine gesetzliche Regelung hierzu findet sich in **§ 154 Abs. 1 Satz 2 BGB**. Dass die Verständigung über die einzelnen Punkte nicht „bindend“ ist, bedeutet auch, dass die Klausel noch einmal aufgegriffen und abgeändert werden kann. Das kann sich als notwendig erweisen, wenn zwischen den Kontrahenten ein schwieriger Kompromiss erreicht werden muss, und eine Seite nur bereit ist, zu einer Frage nachzugeben, wenn eine schon festgestellte andere Klausel noch zu ihren Gunsten geändert wird.
- 102** Werden die Verhandlungen erfolgreich abgeschlossen, ist am Ende ein Vertragstext erarbeitet, auf den sich beide Delegationen geeinigt haben. Selbstverständlich gilt damit diese vertragliche Regelung noch nicht. Vielfach werden die Verhandlungsdelegationen zum Abschluss des Vertrages gar nicht berechtigt sein. Der Abschluss des Vertrages erfordert einen weiteren Schritt und bleibt deshalb noch vorbehalten.

81 Nach *Bork* AT Rdn. 701 (a.E.) sind die §§ 145 ff BGB „für diesen Fall nicht gedacht, können aber, wo es passt, im Einzelfall analog herangezogen werden“. Nach *Bischoff*, Der Vertragsschluss beim verhandelten Vertrag (2001) S. 207 können die §§ 145–153 BGB auf Verträge, die durch gemeinsame Zustimmung zu einem Vertragstext geschlossen werden, keine Anwendung finden. Die Gegenposition (unmittelbare Anwendbarkeit der §§ 145 ff auf den Abschluss von Verträgen im Wege gemeinsamer Zustimmung zu einem Vertragstext) vertritt NK-BGB/G. *Schulze* vor §§ 145–157 Rdn. 17.

82 *PWW/Brinkmann* vor §§ 145 ff BGB Rdn. 45.

83 Hierzu *Leenen* AcP Bd. 188 (1988), 382 (404 ff).

## b. Die In-Geltung-Setzung der vertraglichen Regelung

Die meisten Verträge, die in dieser Technik abgeschlossen werden, sind entweder von Gesetzes wegen formbedürftig, oder es ist doch Schriftform zwischen den Vertragsschließenden vereinbart worden. Die Einhaltung der Form dient dann typischerweise als „Stempel des fertigen juristischen Willens“, <sup>84</sup> sie hat konstitutive Bedeutung für das Zustandekommen des Vertrages. <sup>85</sup> Für die gewillkürte Schriftform gilt dies gemäß § 154 Abs. 2 BGB als Auslegungsregel: Haben die Kontrahenten Beurkundung (also in aller Regel: Schriftform) vereinbart, so ist der Vertrag im Zweifel nicht geschlossen, bis die Beurkundung erfolgt ist. <sup>86</sup>

Bei der **notariellen Beurkundung** eines Grundstückskaufvertrages geben beide Seiten ihre auf den Abschluss des Vertrages gerichteten Willenserklärungen dadurch ab, dass sie die Niederschrift des Notars über die Verhandlung unterzeichnen (unten § 9 Rdn. 189). Diese Niederschrift enthält den Vertragstext, der ihnen vom Notar verlesen und erläutert worden ist.

Gilt für den Vertrag **Schriftform** (kraft Gesetzes oder kraft Verabredung der Parteien), so muss gemäß § 126 Abs. 2 BGB „die Unterzeichnung der Parteien auf derselben Urkunde erfolgen“. Werden über den Vertrag mehrere gleich lautende Urkunden aufgenommen, so genügt es, wenn jede Partei die für die andere Partei bestimmte Urkunde unterzeichnet (§ 126 Abs. 2 Satz 2). Dass „über den Vertrag“ Urkunden aufgenommen werden, entspricht der Technik der gemeinsamen Zustimmung zu einem Vertragstext. Zwar kann für die Einhaltung einer vereinbarten Schriftform gemäß § 127 Abs. 2 Satz 1 BGB auch ein Briefwechsel genügen, doch macht dies nur für Verträge Sinn, die im Wege von Antrag und Annahme geschlossen werden. Ist der Vertragstext zunächst gemeinsam ausgehandelt worden und Schriftform für den Abschluss des Vertrages vorgesehen, manifestiert sich der Rechtsbindungswille der Vertragsparteien in der Beurkundung gemäß § 126 BGB.

Die Funktion einer solchen „Abschlussperre“ <sup>87</sup> kann auch **gesetzlichen Formerfordernissen** zukommen, wenn die Vertragsschließenden (erst) die Beachtung der gesetzlichen Form als Ausdruck des gegenseitigen Rechtsbindungswillens ansehen. So ist es typischerweise bei einem Grundstückskaufvertrag, der nach dem Verständnis der Vertragspartner erst mit der notariellen Beurkundung (§ 311 b Abs. 1 Satz 1 BGB, dazu unten § 9 Rdn. 187 ff) zustande kommen soll, auch wenn die Einzelheiten des Vertrages zuvor ausgehandelt und festgelegt werden. Anders, wenn die Parteien – was freilich in der Praxis kaum vorkommt – verabreden, dass sie sich mit einem schriftlichen Grundstückskaufvertrag begnügen wollen. Dann soll die Unterzeichnung der privatschriftlichen Urkunde abschließender Ausdruck des Rechtsbindungswillens der Kontrahenten sein. Der Vertrag kommt mit der Einhaltung der von den Kontrahenten verabredeten Form gemäß § 154 Abs. 2 BGB zustande, ist aber wegen des Mangels der gesetzlich vorgeschriebenen Form nichtig (§§ 311 b Abs. 1 Satz 1, 125 BGB). Der Formmangel kann gemäß § 311 b Abs. 1 Satz 2 BGB geheilt, der Vertrag hierdurch noch wirksam werden. <sup>88</sup>

84 Mot. I, S. 179 = Mugdan I, S. 154 in Kennzeichnung eines typischen Formzweckes. Dazu unten § 9 Rdn. 147.

85 MüKo/Busche § 154 Rdn. 10.

86 Palandt/Ellenberger § 154 Rdn. 4: Die Einhaltung der Form sei im Zweifel Abschlussvoraussetzung, der Vertrag komme im Zweifel erst mit der Beurkundung zustande. Ebenso Petersen JURA 2009, 419 (420).

87 Diesen Begriff verwendet auch Bischoff, Der Vertragsschluss beim verhandelten Vertrag (2001) S. 210, 223, 230; NK-BGB/G. Schulze § 154 Rdn. 2.

88 Anders, wenn § 154 Abs. 2 BGB eingreift und es somit überhaupt an einem Vertrag fehlt, der wegen Formmangels nichtig sein könnte: Hierzu das Beispiel bei Brehm AT Rdn. 542.
